# Supplementary material for: Topological Characteristics Associated with Intraoperative Stimulation Related Epilepsy of Glioma Patients: A DTI Network Study
Source: Research Square preprint supplement (doi:10.21203/rs.3.rs-616252/v1), 2021-06-15
Supplement: Supplementary file 1 [file 54874cf111188865fbcb64ec.docx]

**Supplementary Table 4 Seven nodes that exhibited degree centrality difference**

| Node | ANOVA *P* value (FDR corrected) | | | |
| --- | --- | --- | --- | --- |
| Binary  (0.0037) | FA weighted  (0.013) | FN weighted  (0.002) | FL weighted  (0.006) |
| A6m_L | **0.00047** | **0.00039** | **0.002** | **0.0017** |
| A6m_R | **0.00037** | **0.00047** | **0.0014** | **0.0023** |
| A4t_R | 0.085 | **0.005** | **0.00061** | **0.0019** |
| A4ul_L | 0.381 | 0.027 | **0.00044** | 0.027 |
| A4ul_R | 0.085 | **0.010** | **0.001** | **0.003** |
| A123tru_L | 0.381 | **0.013** | **0.002** | **0.0037** |
| A123tru_R | 0.213 | 0.027 | **0.001** | 0.0062 |
