# Supplementary material for: Topological Characteristics Associated with Intraoperative Stimulation Related Epilepsy of Glioma Patients: A DTI Network Study
Source: Research Square preprint supplement (doi:10.21203/rs.3.rs-616252/v1), 2021-06-15
Supplement: Supplementary file 2 [file 62631a6e58e46adc9dd51199.docx]

**Supplementary Table 5 Nodal efficiency difference of A6mL and A6mR**

| Node | weighting | Post-hoc *P* value | | |
| --- | --- | --- | --- | --- |
| Ep vs. Con | nEp vs. Con | Ep vs. nEp |
| A6m_L | Binary | **0.003** | 0.556 | **0.004** |
| FA | **0.002** | 0.401 | **0.004** |
| FN | **0.004** | **0.011** | 0.241 |
| FL | **0.004** | 0.402 | **0.0016** |
| A6m_R | Binary | **0.002** | 0.556 | **0.007** |
| FA | **0.001** | 0.264 | **0.005** |
| FN | **0.004** | **0.009** | 0.332 |
| FL | **0.003** | 0.211 | **0.023** |
